# Supplementary material for: Ligand-Based Virtual Screening, Molecular Docking, and Molecular Dynamic Simulations of New β-Estrogen Receptor Activators with Potential for Pharmacological Obesity Treatment
Source: MDPI journal article supplement (doi:10.3390/molecules28114389), 2023-05-27
Supplement: s1 [file s1]

# Ligand-based virtual screening, molecular docking, and molecular dynamic simulations of new $\beta$ -estrogen receptor activators with potential for pharmacological obesity treatment

Domingo Mendez-Alvarez<sup>1</sup>, María F. Torres-Rojas<sup>2</sup>, Edgar E. Lara-Ramírez<sup>1</sup>, Laurence A. Marchat<sup>2</sup>, Gildardo Rivera<sup>1\*</sup>

<sup>1</sup> Laboratorio de Biotecnología Farmacéutica, Centro de Biotecnología Genómica, Instituto Politécnico Nacional, 88710 Reynosa, México.

<sup>2</sup> Laboratorio de Biomedicina Molecular 2, Escuela Nacional de Medicina y Homeopatía, Instituto Politécnico Nacional, Ciudad de México, México.

## Supplementary material

**Table S1.** PDB ID of estrogen receptor beta used in this study.

| PDB ID Description |                                |      |                                |
|--------------------|--------------------------------|------|--------------------------------|
| 1L2J               | Estrogen receptor beta, 271 aa | 2I0G | Estrogen receptor beta, 257 aa |
| 1NDE               | Estrogen receptor beta, 255 aa | 2JJ3 | Estrogen receptor beta, 257 aa |
| 1QKM               | Estrogen receptor beta, 255 aa | 2NV7 | Estrogen receptor beta, 238 aa |
| 1U3Q               | Estrogen receptor beta, 240 aa | 2QTU | Estrogen receptor beta, 257 aa |
| 1U3R               | Estrogen receptor beta, 241 aa | 2YJD | Estrogen receptor beta, 240 aa |
| 1U3S               | Estrogen receptor beta, 240 aa | 2YLY | Estrogen receptor beta, 240 aa |
| 1U9E               | Estrogen receptor beta, 241 aa | 2Z4B | Estrogen receptor beta, 257 aa |
| 1X76               | Estrogen receptor beta, 240 aa | 3OLL | Estrogen receptor beta, 240 aa |
| 1X78               | Estrogen receptor beta, 240 aa | 3OLS | Estrogen receptor beta, 240 aa |
| 1X7B               | Estrogen receptor beta, 240 aa | 3OMO | Estrogen receptor beta, 240 aa |
| 1X7J               | Estrogen receptor beta, 240 aa | 3OMP | Estrogen receptor beta, 240 aa |
| 1YY4               | Estrogen receptor beta, 268 aa | 3OMQ | Estrogen receptor beta, 240 aa |
| 1YYE               | Estrogen receptor beta, 268 aa | 4J24 | Estrogen receptor beta, 240 aa |
| 1ZAF               | Estrogen receptor beta, 238 aa | 4J26 | Estrogen receptor beta, 240 aa |
| 2FSZ               | Estrogen receptor beta, 246 aa | 4ZI1 | Estrogen receptor beta, 249 aa |
| 2GIU               | Estrogen receptor beta, 241 aa | 5TOA | Estrogen receptor beta, 249 aa |

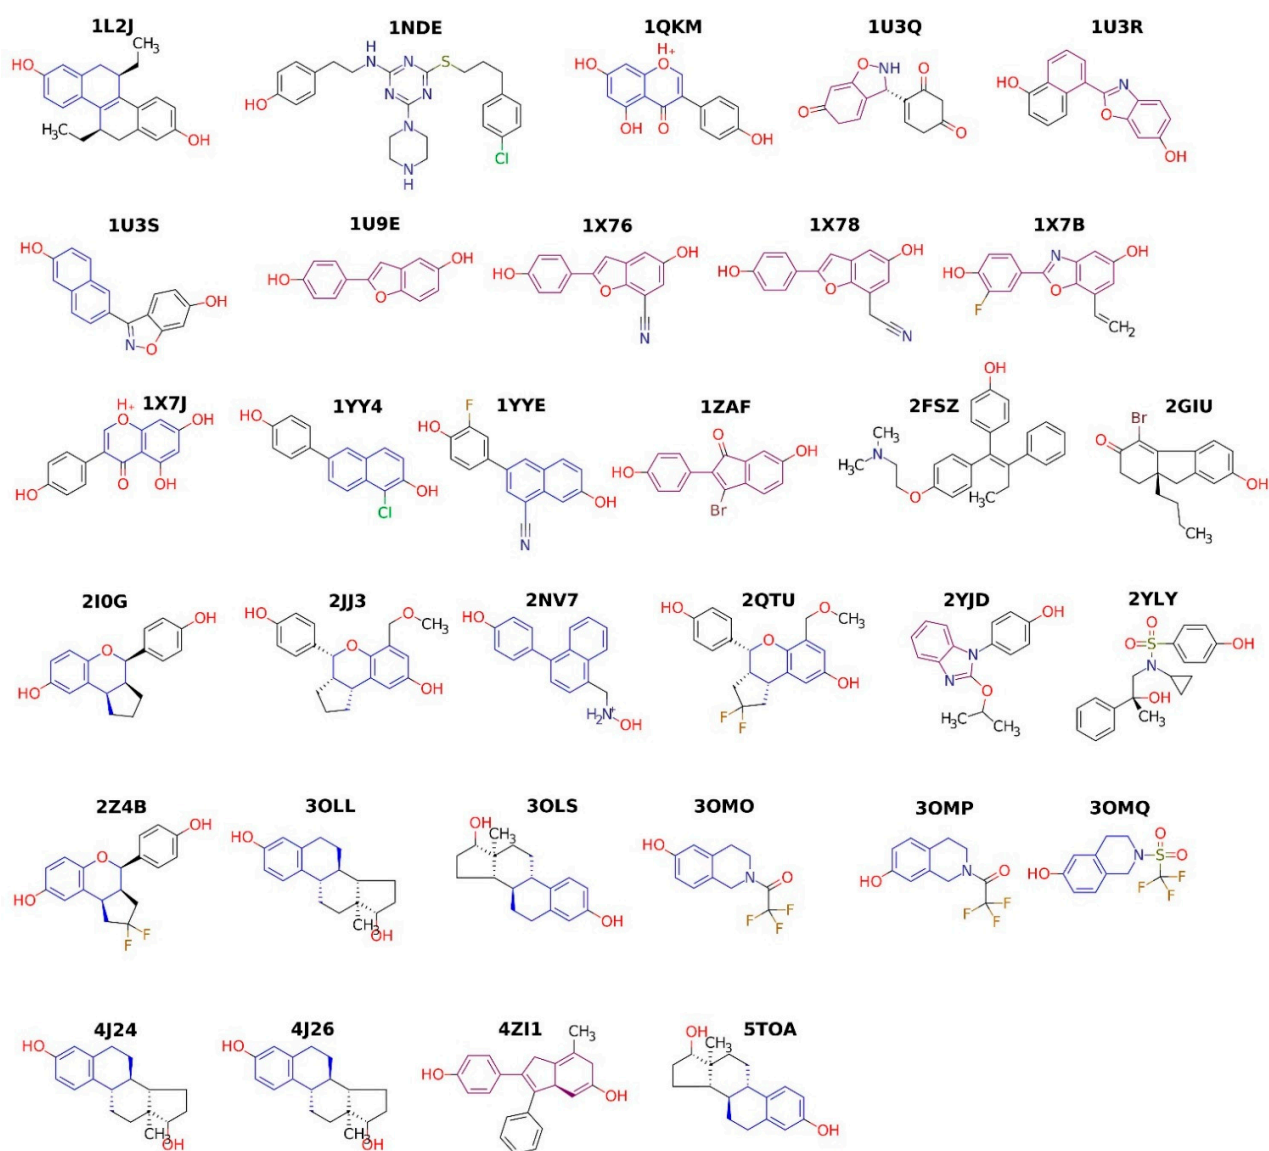

**Figure S1.** Co-crystallized ligands of estrogen receptor beta (ER $\beta$ ). Each compound is identified by its PDB code. Compounds highlighted in blue were used to generate scaffold A and those used for scaffold B are in purple.

**Table S2.** Number of compounds for each stage of virtual screening.

| Criteria                              | Sim  |       |      | Sub   |       |      | Total |
|---------------------------------------|------|-------|------|-------|-------|------|-------|
|                                       | SA   | SB    | SE   | SA    | SB    | SE   |       |
| Compounds retrieved from the database | 2318 | 24571 | 3514 | 10671 | 46315 | 6796 | 94185 |
| Lipinski's rule                       | 123  | 1093  | 14   | 203   | 1097  | 100  | 2630  |
| Elimination of duplicate compounds    | 109  | 768   | 13   | 189   | 595   | 59   | 1733  |
| Compounds with a similarity > 0.8     | 29   | 104   | 13   | 189   | 595   | 59   | 989   |

Sim, similarity; Sub, substructure; SA, Scaffold A; SB, Scaffold B; SE, S-equal.

**Table S3.** Post-selection of potential ER $\beta$  activators by groups.

| Criteria                             | Sim  |    |    |    | Sub |     |    | Total |
|--------------------------------------|------|----|----|----|-----|-----|----|-------|
|                                      | FDA  | SA | SB | SE | SA  | SB  | SE |       |
| <b>Cut-off value (-4.4 kcal/mol)</b> | 1103 | 15 | 58 | 11 | 156 | 625 | 90 | 2058  |
| <b>Interaction fingerprint</b>       | 149  | 1  | 3  | 1  | 27  | 72  | 15 | 268   |

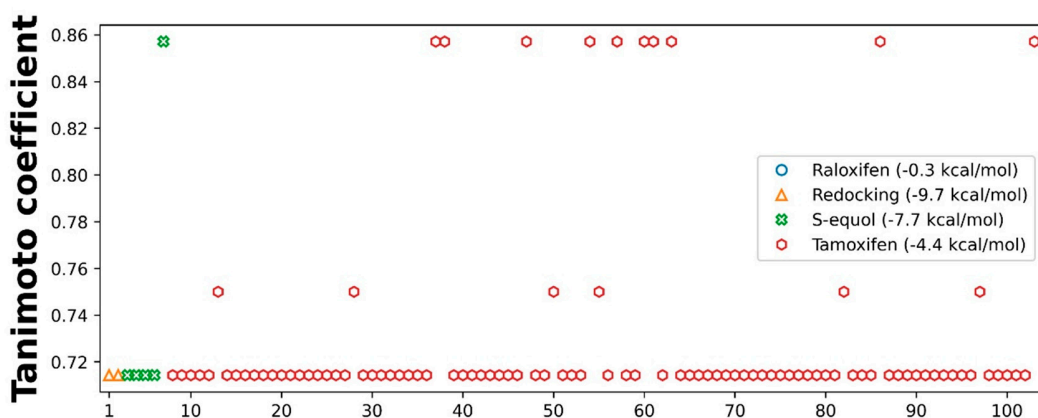

**Figure S2.** Interaction fingerprint of the selected compounds derived from the scaffolds A and B with a tanimoto coefficient > 0.7. Name of the compounds in the graph:

1: ZINC000000235493\_sub\_S2.4 (-9.1 kcal/mol); 2: ZINC000000558601\_sub\_S2.4 (-8.3 kcal/mol); 3: pubchem16096242\_sub\_S2.7 (-8.5 kcal/mol); 4: pubchem16114609\_sub\_S2.9 (-8.7 kcal/mol); 5: pubchem44550346\_sub\_S2.7 (-8.2 kcal/mol); 6: ZINC000006720868\_sub\_S1.3 (-7.4 kcal/mol); 7: ZINC000043152477\_sub\_S2.6 (-6.7 kcal/mol); 8: pubchem102029570\_sub\_S2.7 (-7.0 kcal/mol); 9: pubchem102159833\_sub\_S2.7 (-8.8 kcal/mol); 10: pubchem11290215\_sub\_S2.6 (-10.6 kcal/mol); 11: pubchem134968537\_sub\_S2.9 (-9.1 kcal/mol); 12: pubchem13901656\_sub\_S2.6 (-10.0 kcal/mol); 13: pubchem14387309\_sub\_S2.6 (-10.3 kcal/mol); 14: pubchem14387311\_sub\_S2.6 (-9.8 kcal/mol); 15: pubchem147054884\_sub\_S2.9 (-9.1 kcal/mol); 16: pubchem14920722\_sub\_S2.7 (-7.9 kcal/mol); 17: pubchem21032991\_sub\_S2.7 (-7.3 kcal/mol); 18: pubchem3027594\_sim\_S2.4 (-9.5 kcal/mol); 19: pubchem3784895\_sub\_S2.7 (-9.3 kcal/mol); 20: pubchem4253040\_sub\_S2.4 (-7.8 kcal/mol); 21: pubchem50850272\_sub\_S2.7 (-8.8 kcal/mol); 22: pubchem53423166\_sub\_S2.7 (-8.9 kcal/mol); 23: pubchem53497102\_sim\_S2.4 (-8.6 kcal/mol); 24: pubchem87145216\_sub\_S2.9 (-8.8 kcal/mol); 25: pubchem90477262\_sub\_S2.7 (-8.4 kcal/mol); 26: pubchem92045574\_sub\_S2.7 (-8.7 kcal/mol); 27: pubchem95910620\_sub\_S2.7 (-8.4 kcal/mol); 28: ZINC00000006701\_sub\_S2.7 (-9.0 kcal/mol); 29: ZINC000000019637\_sub\_S2.7 (-8.6 kcal/mol); 30: ZINC000000079780\_sub\_S1.3 (-8.2 kcal/mol); 31: ZINC000000099912\_sub\_S1.10 (-7.8 kcal/mol); 32: ZINC000000099914\_sub\_S1.10 (-5.5 kcal/mol); 33: ZINC000000107820\_sub\_S1.3 (-9.5 kcal/mol); 34: ZINC000000207155\_sub\_S1.10 (-6.9 kcal/mol); 35: ZINC000000207161\_sub\_S1.10 (-4.8 kcal/mol); 36: ZINC000000235985\_sub\_S2.7 (-8.5 kcal/mol); 37: ZINC000000273801\_sub\_S1.3 (-8.1 kcal/mol); 38: ZINC000000329772\_sub\_S1.3 (-8.3 kcal/mol); 39: ZINC000000349576\_sub\_S2.3 (-8.8 kcal/mol); 40: ZINC000000392849\_sub\_S1.12 (-10.0 kcal/mol); 41: ZINC000000506694\_sub\_S2.7 (-8.7 kcal/mol); 42: ZINC000001433321\_sub\_S2.7 (-8.3 kcal/mol); 43: ZINC000001650698\_sub\_S1.3 (-7.8 kcal/mol); 44: ZINC000001665251\_sub\_S1.12 (-9.2 kcal/mol); 45: ZINC000001669547\_sub\_S1.12 (-9.5 kcal/mol); 46: ZINC000001736836\_sub\_S1.3 (-5.6 kcal/mol); 47: ZINC000002584535\_sub\_S2.7 (-8.8 kcal/mol); 48: ZINC000002584539\_sub\_S2.7 (-8.5 kcal/mol); 49: ZINC000002997427\_sub\_S1.3 (-7.4 kcal/mol); 50: ZINC000003109197\_sub\_S1.3 (-7.7 kcal/mol); 51: ZINC000003844826\_sub\_S2.3 (-9.3 kcal/mol); 52: ZINC000003844883\_sub\_S2.3 (-9.0 kcal/mol); 53: ZINC000004571345\_sub\_S1.3 (-7.8 kcal/mol); 54: ZINC000004713938\_sub\_S2.3 (-9.4 kcal/mol); 55: ZINC000004736776\_sub\_S2.4 (-7.7 kcal/mol); 56: ZINC000005361254\_sub\_S2.9 (-7.4 kcal/mol); 57: ZINC000013118874\_sub\_S2.3 (-9.3 kcal/mol); 58: ZINC000016162088\_sub\_S2.7 (-7.8 kcal/mol); 59: ZINC000018051528\_sub\_S2.7 (-9.1 kcal/mol); 60: ZINC000019909740\_sub\_S1.12 (-9.5 kcal/mol); 61: ZINC000019909743\_sub\_S1.12 (-9.3 kcal/mol); 62: ZINC000025495200\_sub\_S2.5 (-7.3 kcal/mol); 63: ZINC000032264139\_sub\_S2.7 (-9.3 kcal/mol); 64: ZINC000032271185\_sub\_S1.6 (-9.6 kcal/mol); 65: ZINC000034283373\_sub\_S2.7 (-9.2 kcal/mol); 66: ZINC000035075930\_sub\_S2.7 (-8.4 kcal/mol); 67: ZINC000035963070\_sim\_S1.10 (-8.2 kcal/mol); 68: ZINC000036406739\_sub\_S1.12 (-9.1 kcal/mol); 69: ZINC000038841808\_sub\_S1.12 (-9.0 kcal/mol); 70: ZINC000038885998\_sub\_S2.5 (-7.8 kcal/mol); 71: ZINC000039120152\_sim\_S2.6 (-8.6 kcal/mol); 72: ZINC000039189287\_sub\_S2.5 (-8.5 kcal/mol); 73: ZINC000039189289\_sub\_S2.5 (-8.6 kcal/mol); 74: ZINC000039212519\_sub\_S2.7 (-9.0 kcal/mol); 75: ZINC000039304508\_sub\_S1.3 (-8.9 kcal/mol); 76: ZINC000045919981\_sub\_S2.7 (-8.9 kcal/mol); 77: ZINC000045923438\_sub\_S2.7 (-8.9 kcal/mol); 78: ZINC000045946712\_sub\_S2.7 (-9.5 kcal/mol); 79: ZINC000045946717\_sub\_S2.7 (-9.3 kcal/mol); 80: ZINC000045946736\_sub\_S2.7 (-9.4 kcal/mol); 81: ZINC000071769464\_sub\_S2.9 (-9.4 kcal/mol); 82: ZINC000071780618\_sub\_S2.6 (-7.8 kcal/mol); 83: ZINC000071784641\_sub\_S2.3 (-10.3 kcal/mol); 84: ZINC000096027552\_sub\_S1.3 (-7.8 kcal/mol); 85: ZINC000100365916\_sub\_S2.3 (-8.8 kcal/mol); 86: ZINC000100496590\_sub\_S2.6 (-9.0 kcal/mol); 87: ZINC000100531228\_sub\_S2.3 (-6.8 kcal/mol); 88: ZINC000103184740\_sub\_S2.12 (-8.7 kcal/mol); 89: ZINC000103184747\_sub\_S2.12 (-8.5 kcal/mol); 90: ZINC000103184834\_sub\_S2.12 (-9.4 kcal/mol); 91: ZINC000103185949\_sub\_S2.12 (-8.7 kcal/mol); 92: ZINC000103187202\_sub\_S2.12 (-9.4 kcal/mol); 93: ZINC000147535771\_sub\_S1.3 (-9.4 kcal/mol); 94: ZINC000169314377\_sub\_S1.3 (-9.5 kcal/mol); 95: ZINC000196467451\_sub\_S2.5 (-7.2 kcal/mol); 96: ZINC000199434926\_sub\_S2.3 (-8.6 kcal/mol); 97: ZINC000254797150\_sub\_S2.3 (-8.6 kcal/mol); 98: ZINC000584596711\_sub\_S2.9 (-8.7 kcal/mol); 99: ZINC000584596772\_sub\_S2.9 (-9.4 kcal/mol); 100: ZINC000584596773\_sub\_S2.9 (-10.1 kcal/mol); 101: ZINC000584649928\_sub\_S2.9 (-9.0 kcal/mol); 102: ZINC000020154399\_sub\_S2.4 (-9.5 kcal/mol); 103: ZINC00108869404\_sub\_S1.12 (-10.3 kcal/mol).

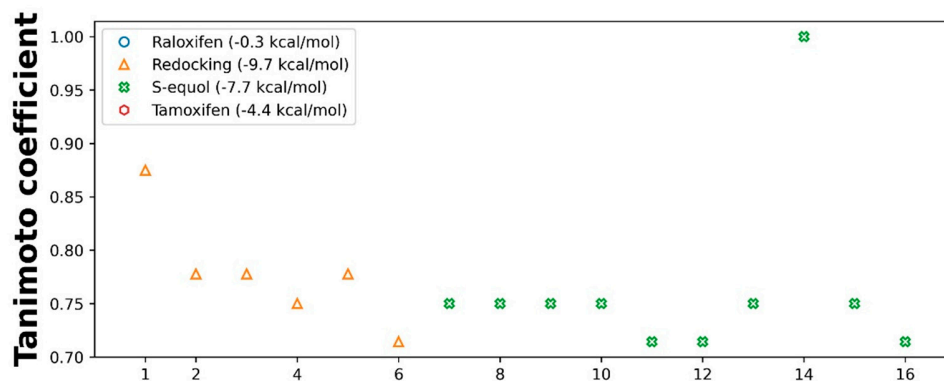

**Figure S3.** Interaction fingerprint of s-equal analogs with respect to control compounds. Name of the compounds in the graph. 1:

ZINC00000388661\_sub (-9.7 kcal/mol); 2: ZINC00000899786\_sub (-10.1 kcal/mol); 3: ZINC00002558134\_sub (-9.9 kcal/mol); 4: ZINC00003978471\_sub (-8.7 kcal/mol); 5: ZINC000014811582\_sub (-9.8 kcal/mol); 6: ZINC000014820588\_sub (-8.8 kcal/mol); 7: ZINC00000899787\_sub (-7.6 kcal/mol); 8: ZINC000001607536\_sub (-7.5 kcal/mol); 9: ZINC000001608397\_sub (-7.0 kcal/mol); 10: ZINC000003833872\_sub (-7.4 kcal/mol); 11: ZINC000004655109\_sub (-6.7 kcal/mol); 12: ZINC0000014758732\_sub (-6.5 kcal/mol); 13: ZINC000014820468\_sub (-6.4 kcal/mol); 14: ZINC000028865986\_sim (-7.7 kcal/mol); 15: ZINC000049601467\_sub (-4.6 kcal/mol); 16: ZINC000138252870\_sub (-6.3 kcal/mol).

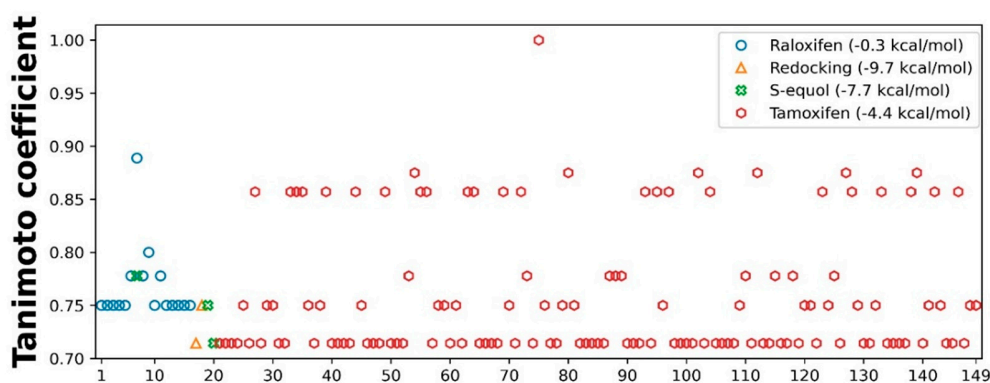

**Figure S4.** Selection of FDA compounds with interaction fingerprint similar to control compounds. Name of the compounds in the graph:

1: ZINC000000000346 (-8.0 kcal/mol); 2: ZINC000000000449 (-8.2 kcal/mol); 3: ZINC0000000601316 (-8.6 kcal/mol); 4: ZINC0000000968326 (-8.1 kcal/mol); 5: ZINC000001530706 (-7.0 kcal/mol); 6: ZINC000001548097 (-6.2 kcal/mol); 7: ZINC000001550766 (-6.7 kcal/mol); 8: ZINC000003785276 (-7.3 kcal/mol); 9: ZINC000003802417 (-5.6 kcal/mol); 10: ZINC000003927200 (-4.8 kcal/mol); 11: ZINC000012468792 (-6.2 kcal/mol); 12: ZINC000019632706 (-5.6 kcal/mol); 13: ZINC000022065398 (-7.1 kcal/mol); 14: ZINC000030691763 (-4.8 kcal/mol); 15: ZINC000085205451 (-6.6 kcal/mol); 16: ZINC000100036536 (-9.0 kcal/mol); 17: ZINC000000002272 (-9.1 kcal/mol); 18: ZINC000118912393 (-10.2 kcal/mol); 19: ZINC000000056652 (-7.0 kcal/mol); 20: ZINC000043207851 (-8.2 kcal/mol); 21: ZINC000000000347 (-5.4 kcal/mol); 22: ZINC000000000506 (-7.3 kcal/mol); 23: ZINC000000000655 (-8.0 kcal/mol); 24: ZINC000000001587 (-8.0 kcal/mol); 25: ZINC000000001982 (-7.3 kcal/mol); 26: ZINC000000002688 (-9.8 kcal/mol); 27: ZINC000000004778 (-8.2 kcal/mol); 28: ZINC000000004893 (-8.9 kcal/mol); 29: ZINC000000006251 (-7.5 kcal/mol); 30: ZINC000000011012 (-8.6 kcal/mol); 31: ZINC000000020248 (-7.5 kcal/mol); 32: ZINC000000020250 (-8.7 kcal/mol); 33: ZINC000000056556 (-7.8 kcal/mol); 34: ZINC000000057001 (-5.8 kcal/mol); 35: ZINC000000057062 (-6.3 kcal/mol); 36: ZINC00000120319 (-7.7 kcal/mol); 37: ZINC000000537752 (-6.5 kcal/mol); 38: ZINC000000538312 (-5.3 kcal/mol); 39: ZINC000000538483 (-7.3 kcal/mol); 40: ZINC000000538627 (-6.3 kcal/mol); 41: ZINC000000584092 (-5.8 kcal/mol); 42: ZINC000000591993 (-5.8 kcal/mol); 43: ZINC000000607939 (-6.0 kcal/mol); 44: ZINC000000607986 (-7.2 kcal/mol); 45: ZINC000000608382 (-5.5 kcal/mol); 46: ZINC000000896560 (-5.5 kcal/mol); 47: ZINC000000897085 (-9.4 kcal/mol); 48: ZINC000000897240 (-7.4 kcal/mol); 49: ZINC000000968273 (-8.6 kcal/mol); 50: ZINC000000968274 (-9.1 kcal/mol); 51: ZINC000000968275 (-9.0 kcal/mol); 52: ZINC000000968303 (-6.7 kcal/mol); 53: ZINC000000968336 (-8.3 kcal/mol); 54: ZINC000001530575 (-7.7 kcal/mol); 55: ZINC000001530579 (-6.5 kcal/mol); 56: ZINC000001530580 (-6.5 kcal/mol); 57: ZINC000001530613 (-7.3 kcal/mol); 58: ZINC000001530617 (-6.1 kcal/mol); 59: ZINC000001530618 (-6.5 kcal/mol); 60: ZINC000001530625 (-8.9 kcal/mol); 61: ZINC000001530689 (-5.0 kcal/mol); 62: ZINC000001530695 (-5.1 kcal/mol); 63: ZINC000001530752 (-6.9 kcal/mol); 64: ZINC000001530761 (-6.4 kcal/mol); 65: ZINC000001530814 (-9.0 kcal/mol); 66: ZINC000001530816 (-7.2 kcal/mol); 67: ZINC000001530817 (-7.2 kcal/mol); 68: ZINC000001530929 (-6.6 kcal/mol); 69: ZINC000001530939 (-7.0 kcal/mol); 70: ZINC000001530951 (-6.5 kcal/mol); 71: ZINC000001530975 (-8.4 kcal/mol); 72: ZINC000001530977 (-9.8 kcal/mol); 73: ZINC000001534965 (-5.9 kcal/mol); 74: ZINC000001542392 (-5.1 kcal/mol); 75: ZINC000001550499 (-10.0 kcal/mol); 76: ZINC000001554010 (-7.5 kcal/mol); 77: ZINC000001850374 (-7.7 kcal/mol); 78: ZINC000001850376 (-7.3 kcal/mol); 79: ZINC000001851149 (-6.3 kcal/mol); 80: ZINC000001886617 (-7.4 kcal/mol); 81: ZINC000001996117 (-4.8 kcal/mol); 82: ZINC000002016257 (-6.7 kcal/mol); 83: ZINC000002016258 (-6.8 kcal/mol); 84: ZINC000003794601 (-7.7 kcal/mol); 85: ZINC000003795819 (-9.1 kcal/mol); 86: ZINC000003798757 (-5.8 kcal/mol); 87: ZINC000003799072 (-6.6 kcal/mol); 88: ZINC000003807172 (-4.7 kcal/mol); 89: ZINC000003810860 (-9.2 kcal/mol); 90: ZINC000003812974 (-6.9 kcal/mol); 91: ZINC000003812988 (-6.5 kcal/mol); 92: ZINC000003812989 (-7.0 kcal/mol); 93: ZINC000003813088 (-6.9 kcal/mol); 94: ZINC000003830339 (-7.6 kcal/mol); 95: ZINC000003830713 (-7.1 kcal/mol); 96: ZINC000003831138 (-6.1 kcal/mol); 97: ZINC000003831165 (-7.1 kcal/mol); 98: ZINC000003831405 (-7.8 kcal/mol); 99: ZINC000003872520 (-5.6 kcal/mol); 100: ZINC000003872738 (-7.3 kcal/mol); 101: ZINC000003874950 (-6.9 kcal/mol); 102: ZINC000003875980 (-5.7 kcal/mol); 103: ZINC000003914808 (-5.2 kcal/mol); 104: ZINC000003929508 (-6.5 kcal/mol); 105: ZINC000003956788 (-8.0 kcal/mol).

kcal/mol); 106: ZINC000003972949 (-7.1 kcal/mol); 107: ZINC000003979899 (-6.3 kcal/mol); 108: ZINC000004217732 (-7.0 kcal/mol); 109: ZINC000004474414 (-4.6 kcal/mol); 110: ZINC000004474460 (-7.0 kcal/mol); 111: ZINC000004618208 (-7.4 kcal/mol); 112: ZINC000004629876 (-4.9 kcal/mol); 113: ZINC000004654889 (-7.4 kcal/mol); 114: ZINC000004676424 (-6.5 kcal/mol); 115: ZINC000004978673 (-6.9 kcal/mol); 116: ZINC000006094354 (-9.0 kcal/mol); 117: ZINC000006845963 (-7.3 kcal/mol); 118: ZINC000006920384 (-6.4 kcal/mol); 119: ZINC000007997897 (-9.7 kcal/mol); 120: ZINC000008214703 (-6.7 kcal/mol); 121: ZINC000008220878 (-6.2 kcal/mol); 122: ZINC000009212654 (-8.4 kcal/mol); 123: ZINC000011680943 (-7.2 kcal/mol); 124: ZINC000012404516 (-4.8 kcal/mol); 125: ZINC000012484958 (-8.8 kcal/mol); 126: ZINC000012503099 (-8.6 kcal/mol); 127: ZINC000012661824 (-8.3 kcal/mol); 128: ZINC000013973998 (-7.2 kcal/mol); 129: ZINC000014881137 (-6.3 kcal/mol); 130: ZINC000019156872 (-8.8 kcal/mol); 131: ZINC000019632614 (-4.7 kcal/mol); 132: ZINC000019632670 (-5.1 kcal/mol); 133: ZINC000033943508 (-8.8 kcal/mol); 134: ZINC000035801098 (-6.4 kcal/mol); 135: ZINC000035999642 (-7.6 kcal/mol); 136: ZINC000053084692 (-7.9 kcal/mol); 137: ZINC000084589076 (-9.0 kcal/mol); 138: ZINC000084758479 (-5.7 kcal/mol); 139: ZINC000096014710 (-8.2 kcal/mol); 140: ZINC000100001918 (-8.1 kcal/mol); 141: ZINC000100001965 (-5.9 kcal/mol); 142: ZINC000100006264 (-8.8 kcal/mol); 143: ZINC000100009278 (-7.8 kcal/mol); 144: ZINC000100018594 (-7.0 kcal/mol); 145: ZINC000100018854 (-5.4 kcal/mol); 146: ZINC000100296828 (-8.0 kcal/mol); 147: ZINC000101489663 (-7.7 kcal/mol); 148: ZINC000116473771 (-4.7 kcal/mol); 149: ZINC000410428674 (-4.5 kcal/mol).

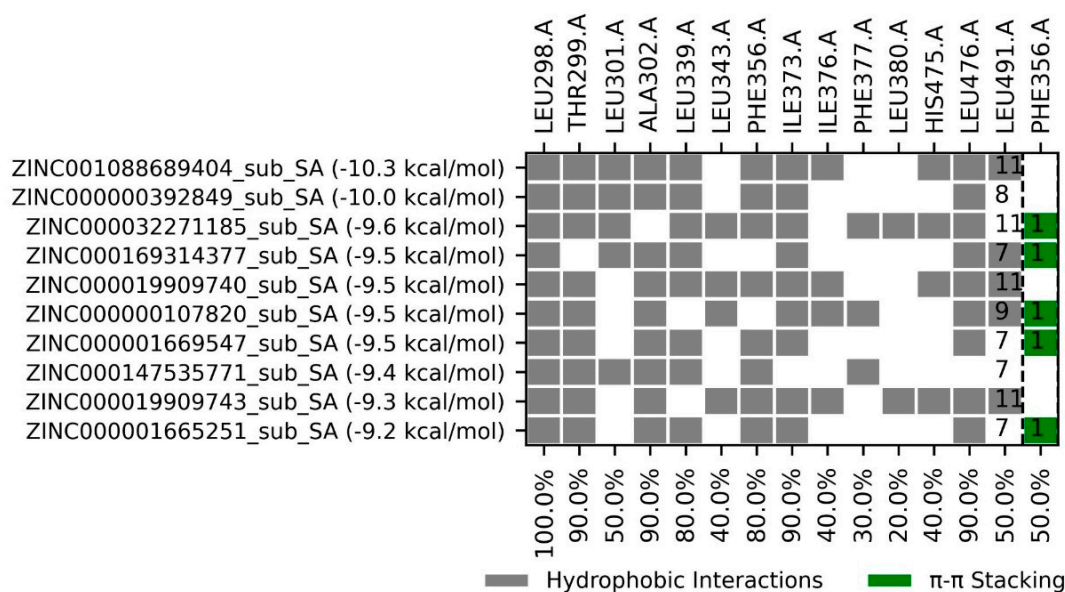

**Figure S5.** Interaction profile of the top ten compounds derived from scaffold A, docked to the active site of ER $\beta$ . The number at the end of each type of interaction is the total number of interactions for each compound.

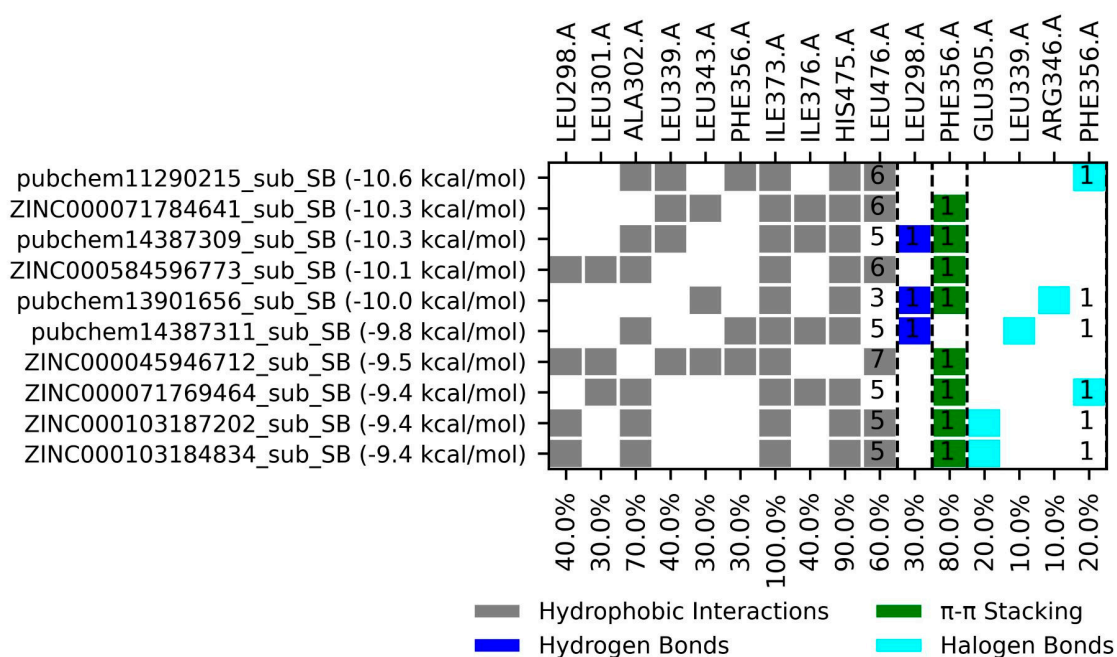

**Figure S6.** Interactions of the top ten scaffold B compounds docked at the active site of the ERβ.

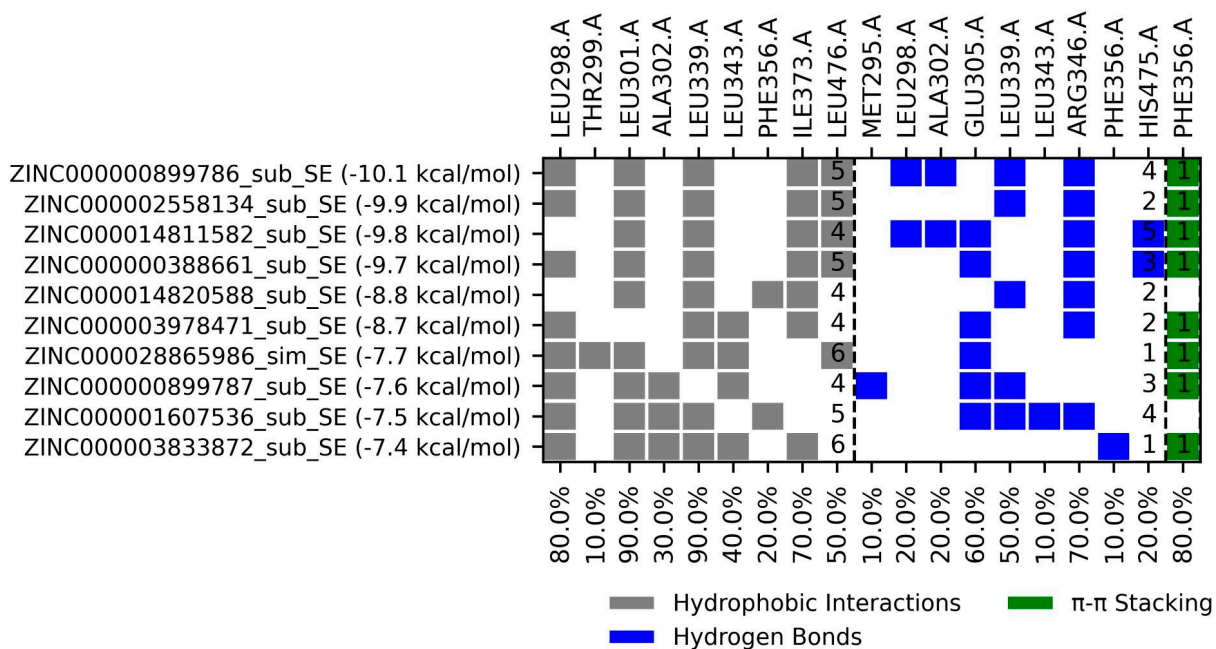

**Figure S7.** Interactions of the top ten compounds of s-equal analogs on the active site of ERβ.



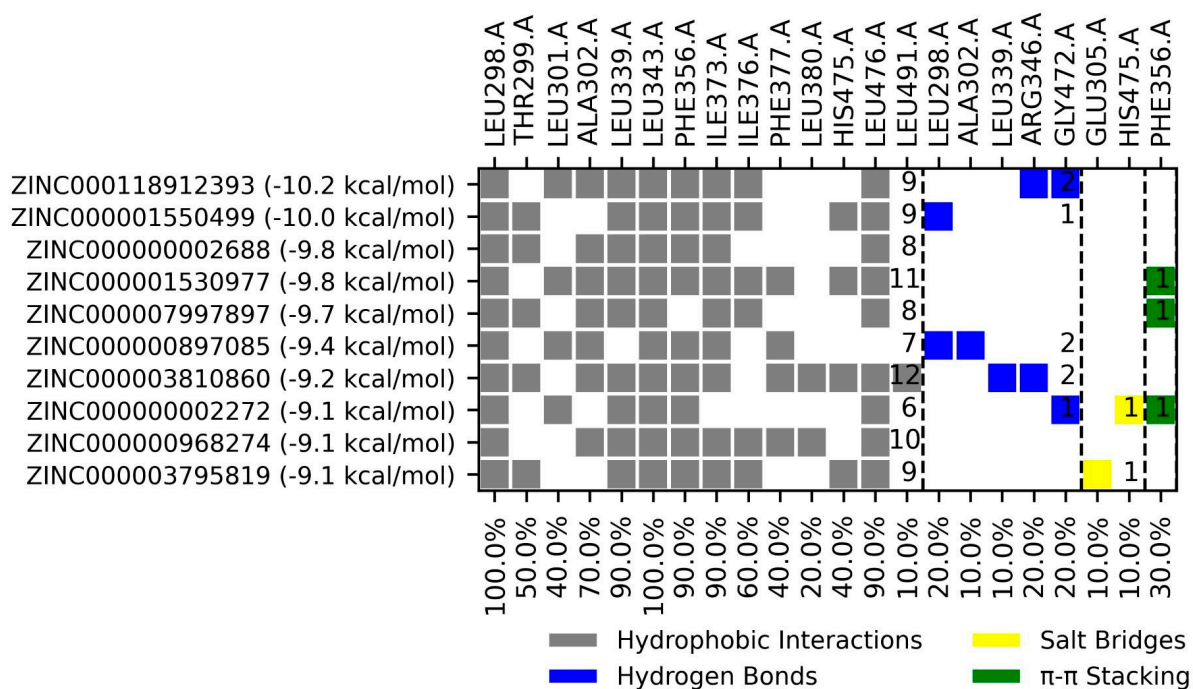

**Figure S8.** The top ten FDA compounds docked to the ERβ active site.

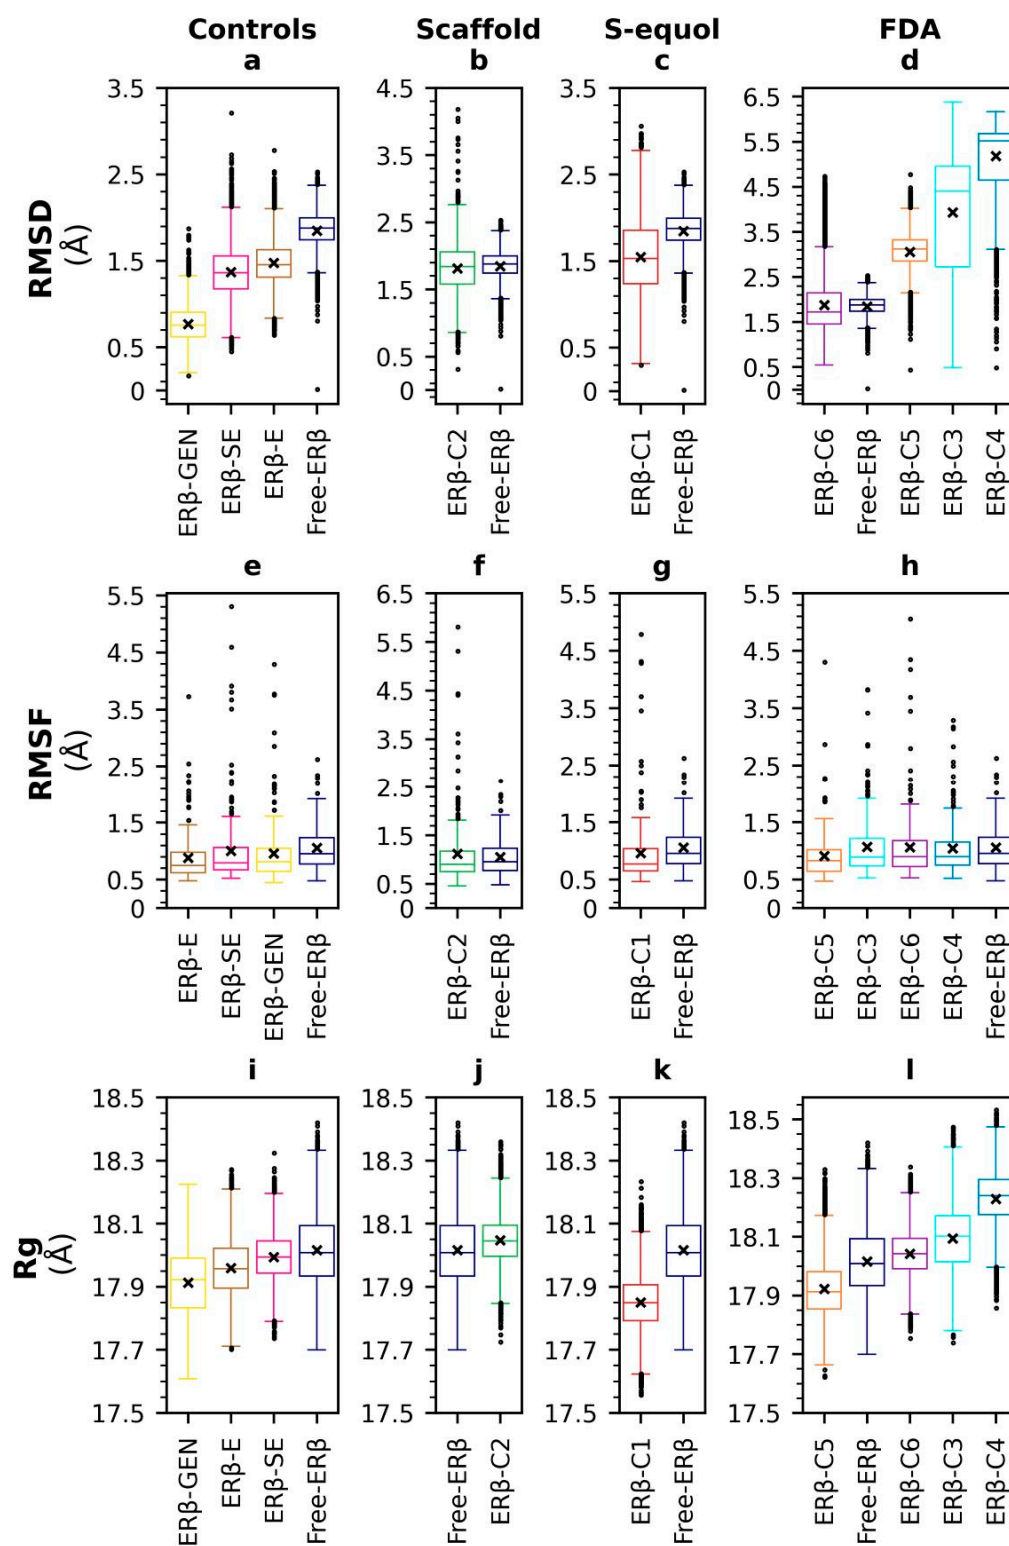

**Figure S9.** Box plot of RMSD (a-d), RMSF (e-h) and Rg (i-l). The graphs are ordered according to the median, the average is represented by an “x”, the points denote outliers.
